# Supplementary material for: Spatial Patterns and Age-Related Changes of the Collagen Crimp in the Human Cornea and Sclera
Source: PubMed Central journal article supplement — Invest Ophthalmol Vis Sci. 2018 Jun;59(7):2987–98. doi: 10.1167/iovs.17-23474 (PMC5995484; doi:10.1167/iovs.17-23474), 2018-06
Supplement: iovs-59-06-50_s01.pdf [file iovs-59-06-50_s01.pdf]

**Supplementary material for Gogola et al. Spatial patterns and age-related changes of the collagen crimp in the human cornea and sclera**

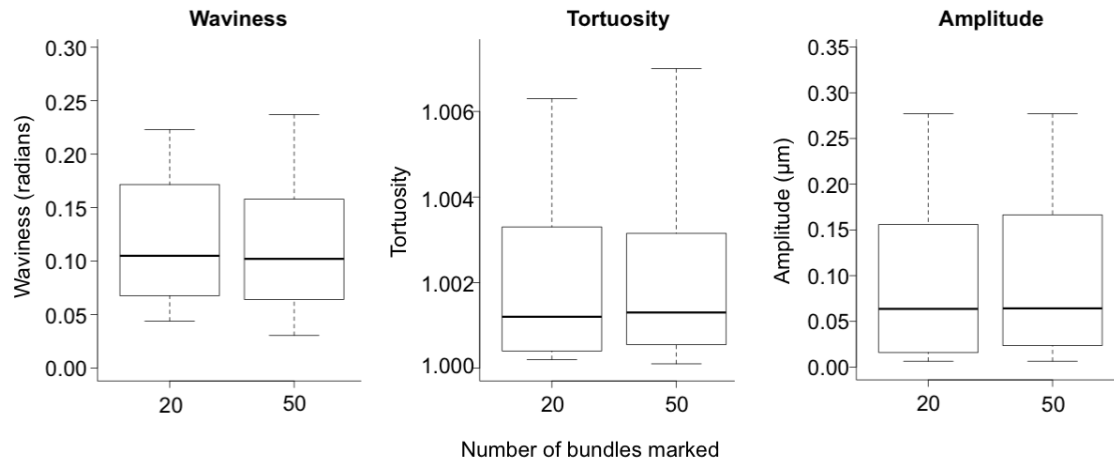

**Supplementary Figure 1.** Effects of number of bundles measured. Side-by-side box plots from 20 and 50 bundles marked in the limbus of subject 15, a male, age 36 years. All three parameters were tested. The medians and quartiles from both sets are highly similar, supporting the use of 20 bundles to obtain a representative sample of a region.

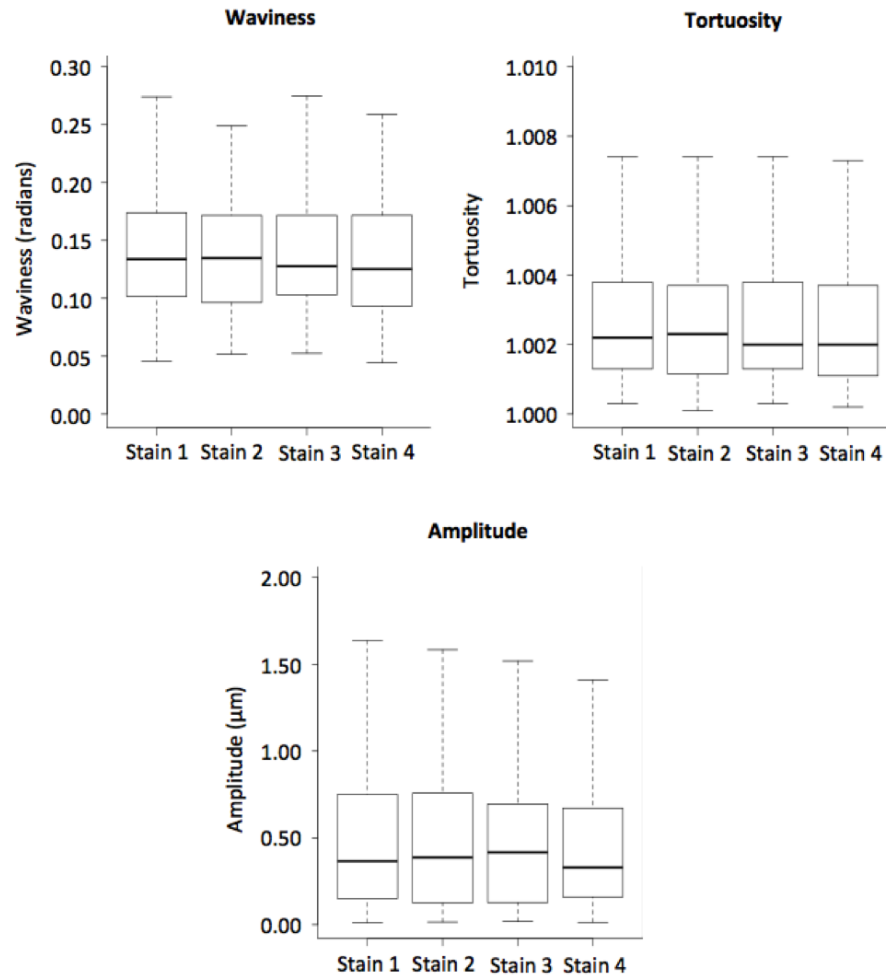

**Supplementary Figure 2.** Comparison of stain types. Boxplots of the four different stain types used in subject 12, a 32 year-old female. All three parameters were tested for all stain types. The medians and the quartiles of the sets are highly similar supporting the use of all viable sections, regardless of stain type.
